# Supplementary material for: Stereotactic ablative body radiotherapy (SABR) combined with immunotherapy (L19-IL2) versus standard of care in stage IV NSCLC patients, ImmunoSABR: a multicentre, randomised controlled open-label phase II trial
Source: PubMed Central journal article supplement (PMC7296663; doi:10.1186/s12885-020-07055-1), 2020-06-15
Supplement: 12885_2020_7055_MOESM3_ESM.pdf [file 12885_2020_7055_MOESM3_ESM.pdf]

| Screening phase<br>C and E-arm                                                                                                                                                                                                                                                                                                                         | <b>PART I:</b><br>Standard of care:<br><i>Oligo - SABR</i><br><i>Poly - (SAB)R</i><br>Day X + 1-14days<br>(depends on total fx) | Last day <b>Friday</b> (72h<br>max before Immuno.)                                                                                                   | <b>PART II:</b><br>Immunotherapy<br>(x6 cycles)<br>Day Y +3 ( <b>Monday</b> )<br>// Y+24 days // +45 //<br>+66 // +87 // +108                                                       | Day Y +5 ( <b>Wednesday</b> )<br>// Y+26 days // +47 //<br>+68 // +89 // +110                                                                                                       | Day Y + 7 ( <b>Friday</b> )<br>// Y+28 days // +49 //<br>+70 // +91 // +112                                                                                                         | <b>Follow-up*</b><br>(most important<br>timepoints showed)<br>Start counting at<br>randomisation day ( <b>R</b> ) |
|--------------------------------------------------------------------------------------------------------------------------------------------------------------------------------------------------------------------------------------------------------------------------------------------------------------------------------------------------------|---------------------------------------------------------------------------------------------------------------------------------|------------------------------------------------------------------------------------------------------------------------------------------------------|-------------------------------------------------------------------------------------------------------------------------------------------------------------------------------------|-------------------------------------------------------------------------------------------------------------------------------------------------------------------------------------|-------------------------------------------------------------------------------------------------------------------------------------------------------------------------------------|-------------------------------------------------------------------------------------------------------------------|
| Before trail inclusion (min1-5days)                                                                                                                                                                                                                                                                                                                    | Start study                                                                                                                     | Day *Y                                                                                                                                               | Day Y + 3                                                                                                                                                                           | Day Y + 5                                                                                                                                                                           | Day Y + 7                                                                                                                                                                           | Day R+12wks                                                                                                       |
| Eligibility: known inclusion/exclusion criteria, (SAB)R, aPD(L)1 maintenance?                                                                                                                                                                                                                                                                          |                                                                                                                                 | Last (SAB)R fx                                                                                                                                       | <b>Pre-injection</b>                                                                                                                                                                | <b>Pre-injection</b>                                                                                                                                                                | <b>Pre-injection</b>                                                                                                                                                                | <b>QOL</b> +WHO + adverse events<br>CT-scan                                                                       |
| Day 1<br>Informed consent<br>Demographics, medical history, physical examination, vital signs (BP, P, T) height and body weight. Assessment of concurrent therapy. Blood sampling (incl pregnancy test) Histology, collection of stratification factors, SOC baseline imaging (<6w).<br>Evaluation of adverse events<br>Investigator decision ECG+LVEF | Day X<br>Start (SAB)R fx(n)<br>Day X + <14<br>Follow-up visit (can be the same as on day Y)                                     | ! Blood for translational research (in case of allocation to arm E this bloodsample can be taken together with the bloodtest on first injection day) | Blood tests<br>WHO<br>Concurrent therapy & medication, PCM 1gr 1h prior, weight                                                                                                     | #Blood tests<br><b>QOL</b> + WHO<br>Concurrent therapy & medication, PCM 1gr 1h prior                                                                                               | #Blood tests<br>WHO<br>Concurrent therapy & medication, PCM 1gr 1h prior                                                                                                            | ! Blood for translational research                                                                                |
| Day 3- ~8<br>(signed informed consent and Eligible conform in&exclusion)                                                                                                                                                                                                                                                                               |                                                                                                                                 |                                                                                                                                                      | <b>During-3h-injection:</b><br>Infusion cycle 30min (BP, T, HR, BR), Adverse events<br><b>Post-injection:</b><br>Infusion cycle (BP, T, HR, BR) at 30min, 1h and 2h, Adverse events | <b>During-3h-injection:</b><br>Infusion cycle 30min (BP, T, HR, BR), Adverse events<br><b>Post-injection:</b><br>Infusion cycle (BP, T, HR, BR) at 30min, 1h and 2h, Adverse events | <b>During-3h-injection:</b><br>Infusion cycle 30min (BP, T, HR, BR), Adverse events<br><b>Post-injection:</b><br>Infusion cycle (BP, T, HR, BR) at 30min, 1h and 2h, Adverse events |                                                                                                                   |
| <b>Randomisation ( R )</b>                                                                                                                                                                                                                                                                                                                             |                                                                                                                                 |                                                                                                                                                      | <b>ONLY FOR ARM "E"</b>                                                                                                                                                             |                                                                                                                                                                                     |                                                                                                                                                                                     | Day R + 24wks<br>CT-scan<br><b>QOL</b> +WHO + adverse events                                                      |
| E-arm>> Plan Planning CT >> Start developing irradiation plan                                                                                                                                                                                                                                                                                          |                                                                                                                                 |                                                                                                                                                      |                                                                                                                                                                                     |                                                                                                                                                                                     |                                                                                                                                                                                     | Day R + 36wks<br>CT-scan<br><b>QOL</b> +WHO + adverse events                                                      |
| <b>Translational blood</b><br>Stool sample + optional biopsy + archived biopsy                                                                                                                                                                                                                                                                         |                                                                                                                                 |                                                                                                                                                      |                                                                                                                                                                                     |                                                                                                                                                                                     |                                                                                                                                                                                     | ! Blood for translational research                                                                                |
| Baseline <b>QOL</b> , Baseline WHO                                                                                                                                                                                                                                                                                                                     |                                                                                                                                 |                                                                                                                                                      |                                                                                                                                                                                     |                                                                                                                                                                                     |                                                                                                                                                                                     | Day R + 48wks<br>//+54wks //+62wks<br>//+70wks //+78wks<br><b>QOL</b> +WHO + adverse events<br>CT-scan            |
| <b>Irradiation plan finished</b>                                                                                                                                                                                                                                                                                                                       |                                                                                                                                 |                                                                                                                                                      |                                                                                                                                                                                     |                                                                                                                                                                                     |                                                                                                                                                                                     |                                                                                                                   |

**Legend - C an E-arm**

**X:** Day were first fx of SABR will be given  
**Y:** Last day of the last fx of SABR  
**R:** Day were randomisation took place

**CR:** Complete response; disappearance all target and non-target lesions & normalization of tumour markers  
**PR:** Partial response; at least a 30% decrease in target lesions, Non target lesions non-PD  
**SD:** Stable disease  
**PD:** Progressive disease; at least a 20% increase and/or new lesions

**QOL:** Quality of life questionnaires (C30, LC13 and EQ5D)

#Blood tests: blood test is only planned if it is the investigator's decision.

\* Be aware that only most important time points are presented. Other time points e.g. 6wks interval (if SOC) are not shown.

Be aware: E-arm patients will receive FU-scans (incl contrast) during L19-IL2 cyclus. FU-scans 1.5 weeks after L19-IL2 infusion but before start new cycle!

BP: blood pressure, ECG: electrocardiogram, fx: fractions, gr: gram, h: hour, HR: heart rate, LVEF: left ventricular ejection fraction, P: puls, R: randomisation, T: temperature, WHO: world health organization Performance Status, wks: weeks.
